1 **Extreme distribution of deleterious variation in a**  
2 **historically small and isolated population – insights**  
3 **from the Greenlandic Inuit**

4  
5 **Casper-Emil T. Pedersen<sup>\*</sup>, Kirk E. Lohmueller<sup>†‡</sup>, Niels Grarup<sup>§</sup>, Peter Bjerregaard<sup>\*\*</sup>,**  
6 **Torben Hansen<sup>§</sup>, Hans R. Siegismund<sup>\*</sup>, Ida Moltke<sup>\*1</sup>, and Anders Albrechtsen<sup>\*1</sup>**

7  
8 **<sup>\*</sup>Department of Biology, Section for Computational and RNA Biology, University of**  
9 **Copenhagen, 2200 Copenhagen N, Denmark**

10  
11 **<sup>†</sup>Department of Ecology and Evolutionary Biology, University of California, Los**  
12 **Angeles, CA 90095, United States**

13  
14 **<sup>‡</sup>Department of Human Genetics, David Geffen School of Medicine, University of**  
15 **California, Los Angeles, CA 90095, United States**

16  
17 **<sup>§</sup>The Novo Nordisk Foundation Center for Basic Metabolic Research,**  
18 **Section of Metabolic Genetics, Faculty of Health and Medical Sciences, University of**  
19 **Copenhagen, 2100 Copenhagen E, Denmark**

20  
21 **<sup>\*\*</sup>National Institute of Public Health, University of Southern Denmark,**  
22 **1353 Copenhagen K, Denmark**

31 **Abstract**

32 The genetic consequences of a severe bottleneck on genetic load in humans are widely  
33 disputed. Based on exome sequencing of 18 Greenlandic Inuit we show that the Inuit have  
34 undergone a severe ~20,000 yearlong bottleneck. This has led to a markedly more  
35 extreme distribution of deleterious alleles than seen for any other human population.  
36 Compared to populations with much larger population sizes, we see an overall reduction in  
37 the number of variable sites, increased numbers of fixed sites, a lower heterozygosity, and  
38 increased mean allele frequency as well as more homozygous deleterious genotypes. This  
39 means, that the Inuit population is the perfect population to examine the effect of a  
40 bottleneck on genetic load. Compared to the European, Asian and African populations, we  
41 do not observe a difference in the overall number of derived alleles. In contrast, using  
42 proxies for genetic load we find that selection has acted less efficiently in the Inuit, under a  
43 recessive model. This fits with our simulations that predict a similar number of derived  
44 alleles but a true higher genetic load for the Inuit regardless of the genetic model. Finally,  
45 we find that the Inuit population has a great potential for mapping of disease-causing  
46 variants that are rare in large populations. In fact, we show that these alleles are more  
47 likely to be common, and thus easy to map, in the Inuit than in the Finnish and Latino  
48 populations; populations considered highly valuable for mapping studies due to recent  
49 bottleneck events.

50

51

52

## 53 Introduction

54 Predictions about the consequences of a small population size on genetic variation are  
55 among the most fundamental theoretical predictions in population genetics <sup>1-3</sup>. Small  
56 populations are more affected by drift than are large populations; therefore, small  
57 populations are predicted to carry lower genetic diversity <sup>1</sup>. Additionally, natural selection  
58 acting against deleterious alleles is predicted to be less efficient in small populations <sup>2</sup>.  
59 Finally, the genetic load, defined as the reduction in fitness caused by deleterious variation  
60 <sup>4</sup>, is predicted to be larger in small populations <sup>1</sup>. With the recent advent of genome-wide  
61 sequencing data from humans, it has become possible to test these predictions in human  
62 populations and numerous studies have pursued this by comparing the distributions of  
63 deleterious alleles across human populations <sup>5-7</sup>. Most of these studies have focused on  
64 genetic consequences of the bottlenecks, i.e. rapid large decreases in population sizes  
65 that all non-Africans populations went through during the Out-Of-Africa (OOA) dispersal.  
66 These studies all agreed that the European population <sup>6-9</sup> and other non-African  
67 populations <sup>5</sup> carry lower levels of genetic diversity compared to the African populations  
68 <sup>10,11</sup> and thus have a higher genetic load assuming mutations have a recessive effect.  
69 However, the studies <sup>7,9,10,12</sup> disagreed in their conclusions about the extent to which  
70 genetic load vary across populations assuming mutation have an additive effect and to  
71 whether selection is less efficient in small populations.

72         There is no direct way of calculating genetic load from genetic data from natural  
73 populations <sup>11</sup>. Instead, summary statistics are used and the conclusions based on  
74 different statistics in different studies vary. On one hand, a recent study by Do et al. <sup>8</sup>  
75 found no difference between the non-African and African 1000 Genomes populations  
76 using the  $R_{XY}$  statistic, which is monotonically related to the difference in number of

77 derived alleles between the two populations. In line with this finding, two other studies  
78 found no significant difference in the number of derived alleles per genome between  
79 individuals of European descent and individuals of African American descent<sup>7,8</sup>. Based on  
80 this observation, Simons et al.<sup>7</sup> concluded that Europeans and African Americans carry  
81 the same amount of genetic load and supported by simulations, they furthermore  
82 concluded that genetic load is not affected much by recent population size changes. On  
83 the other hand, other studies found slightly, but significantly, more derived deleterious  
84 alleles per individual in the European population than in African populations<sup>6,9</sup> implying  
85 that the OOA bottleneck has led to a small increase in genetic load in the European  
86 population. Similarly, in a recent study of seven populations, Henn et al.<sup>5</sup> reported that the  
87 non-African populations on average harbor slightly more derived alleles among alleles with  
88 large Genomic Evolutionary Rate Profiling (GERP) scores. Furthermore, Henn et al.<sup>5</sup>  
89 reported a small, but significant, difference in load across the seven populations under an  
90 additive effect model when load is estimated using selection coefficients approximated  
91 based on GERP scores.

92 The consequences of smaller population sizes on the efficacy of selection in  
93 humans was first investigated in a study of exome data from 15 African Americans and 20  
94 Europeans<sup>13</sup>. That study showed that the proportion of SNPs that are non-synonymous,  
95 and thus likely deleterious, is larger in Europeans than in African Americans. This  
96 observation was initially interpreted as being, in part, due to less efficient selection during  
97 the OOA bottleneck<sup>5</sup> combined with the recent influx of nonsynonymous mutations during  
98 the recovery of the bottleneck. Several later studies have come to similar conclusions<sup>5,9,11</sup>.  
99 In contrast, based on their results about genetic load described above, Do et al.<sup>8</sup>  
100 concluded the efficacy of selection was not reduced due to the reduced population size

101 during the OOA bottleneck <sup>7,8</sup>. A recent review <sup>11</sup> tried to reconcile the different  
102 observations and conclusions by pointing out that different studies have focused on  
103 different definitions of the efficacy of selection and use different metrics to quantify it. The  
104 review ends by calling for descriptions of empirical patterns of deleterious mutations in  
105 other human populations than Europeans and Africans with different population size  
106 histories to shed further light on the questions about the effect of small size on selection  
107 and load. Motivated by this, we here analyze patterns of deleterious mutations in the  
108 Greenlandic Inuit (GI) population based on exome sequencing data from 18 GI individuals.

109         The GI came to Greenland less than 1000 years ago <sup>14,15</sup> and a previous study has  
110 shown that their ancestors split from the closest large old-world population, the Han  
111 Chinese (CHB) population, some ~23K years before present with only a limited amount of  
112 subsequent gene flow <sup>16</sup>. The study also showed that the GI population has a very small  
113 effective population size <sup>16</sup>. This suggests that the GI population has likely been small and  
114 isolated for a long period of time after the OOA dispersal took place. Analyses of the GI  
115 population could therefore be particularly important for resolving the open questions about  
116 whether a small effective population size has had any effect on genetic load and selection  
117 in human populations.

118         In this paper we first show that the GI population is indeed one of the smallest  
119 populations in the world and therefore valuable to analyze. Then we compare different  
120 proxies for genetic load between the GI and Europeans, as well as investigate several  
121 additional measures related to efficacy of selection. And based on our results we discuss  
122 the effect of a small population size on load and selection. Finally, we present analyses  
123 that investigate the consequence of our findings to disease genetics, which show that the  
124 GI population has great potential for leading to discoveries of new disease related genetic

125 variants that have been missed in large scale GWAS in Europeans and other large  
126 populations.

127

## 128 **Materials and Methods**

### 129 **Exome Datasets:**

130 We based all of our analyses of the GI population on the high-depth whole exome  
131 sequencing data from Moltke et al. <sup>17</sup>. This dataset consists of data from 9 Greenlandic  
132 trios, however we restricted our analyses to data from the 18 parents. The GI data was  
133 both analyzed alone and together with other datasets: 1) whole exome sequencing data  
134 from 18 unrelated Utah residents with Northern and Western European ancestry (CEU), 18  
135 Han Chinese individuals from Beijing (CHB) and Yoruban individuals from Ibadan, Nigeria  
136 (YRI) from the 1000 Genomes project <sup>18</sup>, 2) an exome dataset which includes Mayans,  
137 Mbuti and Cambodians from Henn et al. <sup>5</sup> and 3) called genotypes from the 1000 Genome  
138 low-coverage data. The analyzed datasets are described in detail below.

139 *GI dataset* This dataset consists of high-depth exome data from 18 GI individuals. To  
140 generate it, Moltke et al. <sup>19</sup> performed SNP and indel calling followed by genotype calling  
141 for the exome data from the 18 Greenlandic samples using Samtools version 0.1.18 <sup>20</sup>.  
142 Reads with a mapping quality lower than 30 as well as bases with a base quality lower  
143 than 20 had been removed. SNPs had been called using standard settings and genotypes  
144 were called based on the highest genotype likelihood. We used VCFtools version 0.1.11 <sup>21</sup>  
145 for filtering. We removed SNVs where all individuals were heterozygous, which are likely  
146 genotype errors. In addition, we removed sites with sequencing depth lower than 10 for all  
147 individuals or higher than 500. The resulting dataset comprise 133.808 SNVs within the

148 exome. This data set was used solely for identifying absolute numbers of SNVs across a  
149 number of functional categories and for inferring population size changes through time.

150

151 **Combined exome dataset:**

152 This dataset consists of exome data from both the GI and the CEU population. Further,  
153 this dataset also includes exome data from 18 Han Chinese individuals in Beijing (CHB)  
154 and 18 Yoruban individuals in Ibadan, Nigeria (YRI). To generate it, we performed joint  
155 SNP and genotype calling for the exome data from both populations using ANGSD<sup>22</sup>  
156 under the Samtools<sup>18</sup> genotype likelihood model. Reads with a mapping quality lower than  
157 30, as well as bases with a base quality lower than 20, were removed. SNVs were called  
158 using a likelihood ratio test<sup>22</sup> with a *P*-value cutoff of  $10^{-6}$  and genotypes were called  
159 based on the highest genotype likelihood. We required a minimum depth of 10 for calling  
160 genotypes and removed sites with missing genotypes and sites, which were triploid when  
161 including the ancestral allele. This dataset comprises 295,065 SNVs. SFS comparison of  
162 1000G genotype calls from the low depth data and our genotype calling from the exome  
163 data for the same individuals revealed no differences in proportions (Figure S7). The  
164 datasets were polarized using the chimp data available within Seattleseq 138 annotation.  
165 For each pairwise comparison only the sites that are polymorphic in the two populations  
166 were used.

167

168 **Dataset from 1000 genomes low-depth whole genome sequencing:**

169 This dataset consists of data from five of the 1000 genomes population samples<sup>18</sup>: Finns  
170 from Finland (FIN), Peruvians from Lima, Peru (PEL), Gujarati Indians from Houston,  
171 Texas (GIH), Utah Residents (CEPH) with Northern and Western Ancestry (CEU), Yoruba

172 in Ibadan, Nigeria (YRI) and Han Chinese in Beijing, China (CHB). To generate the  
173 dataset, we used VCF files with genotypes calls from the complete phase 3 1000genomes  
174 dataset. From this dataset we extracted 11 unadmixed individuals from each of the 5  
175 populations. Because of apparent admixture in the Peruvians, we reduced the sample size  
176 for each population to 11 individuals. Unadmixed individuals from PEL were selected  
177 based on inferred admixture proportions (<5%) using ADMIXTURE. The final dataset  
178 comprised 401.821 SNVs within the exome.

179  
180 **Exome sequencing data for Mayans, Mbuti and Cambodians:**

181 This dataset consists of data from six samples from each of the populations Mayan, Mbuti  
182 and Cambodian. To generate it, we downloaded VCF files with called genotypes for  
183 individuals from seven populations recently made publicly available by Henn et al.<sup>5</sup>. From  
184 this dataset we extracted data from 6 Mbuti Pygmies, 6 Mayan Indians and 6 Cambodians.  
185 More specifically, following Henn et al.<sup>5</sup> we excluded two of the 8 Mayan samples due to  
186 admixture, leaving only 6 Mayan samples. To ensure comparability between the SFSs  
187 inferred from the different populations, we included only 6 randomly chosen individuals  
188 from each of the other populations. The ancestral allele in each dataset was obtained  
189 separately using the Pantro2 chimp allele. The final dataset contains genotype data for  
190 194.278 SNVs.

191  
192 **Annotation of variants:**

193 We divided variant sites into four categories based on the functional category annotated to  
194 the derived allele: synonymous, a combined category of non-coding exons (NCE) and the  
195 leading and trailing untranslated region (UTR), missense and loss of function (LoF).



196 Variant sites which belong to other functional annotations were excluded from further  
197 analysis. We assigned a variant to the putatively most deleterious annotation category  
198 when there were multiple splice variations. We also included an additional category for  
199 loss of function where all isoforms are annotated to be loss of function (denoted LoF<sup>a</sup>),  
200 meaning that these sites are more likely to be deleterious than the sites in the LoF  
201 category. The five categories thus range from mutations that are expected to be neutrally  
202 evolving to mutations that are expected to be highly deleterious.

203 We also divided variants in categories using GERP scores<sup>23</sup>. These GERP score  
204 measures conservation across a phylogeny of 35 mammalian species excluding humans<sup>5</sup>.  
205 Specifically, GERP scores represent the deficiency in numbers of substitutions in  
206 functional loci compared to that of the number of substitutions seen in neutral DNA. This  
207 discrepancy is then regarded as a sign of functional constraint and thus lower degrees of  
208 substitution saturation across the phylogeny will reflect higher levels of purifying selection  
209<sup>5,24</sup>. We used the same approach as Henn et al.<sup>10</sup>: we retrieved the GERP scores from the  
210 UCSC browser and grouped variants into four categories according to their GERP score,  
211 and thus how deleterious they are predicted to be. The categories are “neutral” (GERP <  
212 2), “moderate” ( $2 \leq \text{GERP} < 4$ ), “large” ( $4 \leq \text{GERP} < 6$ ) and finally “extreme” ( $\text{GERP} \geq 6$ ).

213

#### 214 **Population size inference:**

215 We performed inference of population size over time on the GI dataset using the site  
216 frequency spectrum (SFS) based method called stairway plot<sup>25</sup>. We performed the analysis  
217 using default settings.

218

219

220 **Genetic load approximating summary statistics the number of derived alleles:**

221 We used two different proxies for genetic load based on counts of derived alleles: the total  
222 number of derived alleles per individual, which has previously been used to quantify load  
223 under an additive model<sup>9</sup> and the number of homozygous-derived genotypes per  
224 individual, which can equivalently be used to quantify load under a recessive model.

225

226 **The GERP score load:**

227 We also used what we will denote GERP score load. To calculate this, we used the  
228 GERP-based grouping of deleterious sites described above and translated the three non-  
229 neutral GERP score categories into values of selection coefficients as suggested by Henn  
230 et al.<sup>10</sup>. Specifically, the extreme category was assigned  $s = 1 \times 10^{-2}$ , the large category  
231 was assigned  $s = 4.5 \times 10^{-3}$ , while the moderate category was assigned  $s = 4.5 \times 10^{-4}$ . These  
232 assignments were then used in the equation from Kimura<sup>1</sup>

233 
$$Load = 1 - w = 1 - (1 - 2q(1 - q)sh - sq^2)$$

234 which is based on the underlying model where the fitness of each genotype is determined  
235 as 1,  $1 - hs$  and  $1 - s$  for AA, Aa and aa, respectively. We used this equation assuming two  
236 models each with an extreme level of dominance. In the first model  $h$  was set to 0.5, i.e.  
237 we assumed alleles to act additively. In the other model  $h$  was set to 0, i.e. we assumed  
238 deleterious alleles to be completely recessive. To estimate standard error for our GERP  
239 score loads estimates we used a weighted uneven block jackknife, with block sizes of 5Mb  
240 to correct for correlation among neighboring sites<sup>26</sup>.

241

242  **$\pi_{var}$  calculation:**

243 We calculated the nucleotide diversity for the variable sites,  $\pi_{var}$ , for all the populations  
244 included in the SFS comparison in Figure 2. We used the following equation for our  
245 calculations:

$$\pi_{var} = \frac{1}{\binom{2n}{2}} \sum_{i=1}^{2n} x_i (2n - i)i$$

246 where  $x_i$  is the proportion of sites in the  $i$ th category of the site frequency spectrum and  $n$   
247 the number of individuals included in the analysis. We calculated  $\pi_{var}$  rather than  $\pi$  for all  
248 sites, because it is not possible to calculate  $\pi$  for all sites from the 1000 genomes  
249 genotype calls since there is not information for the invariables sites.

250

251

252 **Simulations:**

253 We performed simulations using the forward-time simulation software Selection on Linked  
254 Mutations (SLIM)<sup>27</sup>. We used the population size and the demographic history estimated  
255 for the GI and the CHB by Fumagalli et al.<sup>16</sup>. We initiated simulations with a haploid  
256 population size of 9395 at 29459 generations before the sampling time (present time),  
257 allowing sufficient time for saturation of neutral mutations. During the OOA bottleneck  
258 population size was reduced to 5443 haploid genotypes. The CHB population did not  
259 change population size up until present time. To simulate the additional bottleneck, which  
260 the GI population underwent after splitting from CHB, we introduced an additional  
261 reduction in population size 930 generations before the present, resulting in a population  
262 size of 1550 haploid individuals. We sampled 36 haploid genotypes from each of the  
263 simulated GI and CHB populations, allowing us to capture comparable levels of genetic  
264 diversity as the real data where we have 18 diploid samples from each. For this simulated  
265 demographic scenario, we chose to simulate many sites under selection: 90% were  
266 simulated as neutral mutations and 10% as being under selection. For the deleterious  
267 mutations, we varied the dominance coefficient ( $h$ ) and the selection coefficient ( $s$ ) to  
268 mimic the effects of three modes of inheritance: additive ( $h=0.5$ ), near-recessive ( $h=0.1$ )  
269 and recessive ( $h=0$ ). Furthermore, for each of these modes, we varied the selection  
270 coefficient,  $s$ , across four levels, reflecting increasingly harmful functional effects  
271 ( $s=0.0002$ ;  $s=0.002$ ;  $s=0.02$ ;  $s=0.2$ ). Note, that because SLIM have a different underlying  
272 model of selection implemented than the one we mentioned above, hence the selection  
273 coefficients provided here.

274 Each of the scenarios, i.e. combination of  $h$  and  $s$  value, was simulated 10000 times on a  
275 sequence of 100k sites using a recombination rate of  $1.2 \times 10^{-8}$  bp. and mutation rates of

276  $1.38 \times 10^{-8}$  per generation. Both numbers of derived alleles and numbers of homozygous-  
277 derived genotypes are reported excluding mutations that were fixed in both populations.  
278 Furthermore, we simulated a scenario where all mutations were set to neutral in GI after  
279 the split between GI and CHB. For this simulation, we sampled 36 haploid genotypes both  
280 in the pooled population before the split and in each of the GI and CHB populations.

281

## 282 **Allele frequencies in GI compared to Europeans, East Asians, Finns and Latinos:**

283 To compare allele frequencies for shared alleles across populations, we used the  
284 information available for more than 9.3 million sites based on exome data in the ExAC  
285 browser. This dataset has sufficient number of samples for European and East Asian  
286 populations to allow reliable calculation of rare allele frequencies.

287

## 288 **Results**

### 289 **Inference of demography and SFS:**

290 First we inferred population size of the GI population over time from exome data for 18 GI  
291 using the stairway plot method<sup>25</sup>. The results suggest that the GI population experienced  
292 a marked decrease in size some 22-24 Kya (Figure 1), remained small for more than  
293 20,000 year and only recently started to increase in size. We note that there is a  
294 considerable amount of uncertainty for recent population size estimates, which makes it  
295 difficult to assess the extent of the recent increase.

296 Next, we compared the Site Frequency Spectrum (SFS) of the GI population to the  
297 SFSs of a number of other human populations from the 1000 genomes project (Figure 2)  
298 and Cambodians and Mayans from Henn et al.<sup>5</sup> (Figure S8). Because the SFS is affected  
299 by demographic history<sup>28,29</sup>, this comparison should reveal the extent to which the recent

300 very long bottleneck has made the GI more extreme than other OOA populations. These  
301 comparisons show that the SFS for the GI population is flatter than for all the other  
302 examined populations, which is also reflected in markedly higher nucleotide diversity for  
303 the variable sites ( $\pi_{\text{var}}$ ), which is inversely correlated with  $\pi$  for all sites. Thus compared to  
304 other populations, the GI population has had both a larger depletion of rare variants, as  
305 well as a higher increase in allele frequencies for remaining variants. Hence the GI  
306 population shows evidence for having undergone a more extreme population bottleneck  
307 than the other populations, which means that analyses of this population are likely to be  
308 valuable in resolving the open questions about whether small effective population sizes  
309 have had an effect on genetic load and selection in human populations.

310

#### 311 **Comparison of genetic load in GI and CEU:**

312 Motivated by these initial findings, we compared the genetic load between GI and CEU to  
313 investigate to which extent, if any, the long history with a reduced population size has led  
314 to an increased genetic load in the GI population. For this comparison we used the exome  
315 data from the 18 GI combined with exome data from 18 individuals with European ancestry  
316 (CEU). Since there is no direct way to calculate load from genetic data, we examined  
317 several different statistics, most of which have recently been proposed as approximations  
318 to genetic load.

319 First, we examined load statistics that assume that all alleles have an additive  
320 effect. In particular, we looked at the average number of derived alleles per individual,  
321 which has previously been used both by Fu et al.<sup>9</sup> and Do et al.<sup>8</sup>. We performed the  
322 comparison between GI and CEU by calculating the ratio of this statistic in GI and CEU.  
323 Here a ratio above one would indicate that the average number of derived alleles in GI is

324 higher than that in CEU. We calculated this ratio both for all sites and for sites in 9 different  
325 subcategories that represent a range of different levels putative deleterious effect: five  
326 categories based on functional annotation and four based on GERP scores (for details see  
327 Material and Methods). We did not find a significant difference between the numbers of  
328 derived alleles per individual between the two populations for any of the different functional  
329 annotation-based categories, i.e. the ratios did not differ significantly from 1 (Table 1 and  
330 Figure 3, Figure S4, Figure S1, S2, Table S1 and Table S2). The ratio of derived alleles in  
331 the more deleterious GERP categories show a 1-4% increase in GI compared to CEU  
332 (Figure 4), but this difference is not significant. Similar results are obtained from the  $R_{XY}$   
333 ratio from Do et al. <sup>8</sup> Hence, the results from both these statistics suggest that, under an  
334 additive effect model, the load is the same in the across populations (Table 1, Table S1  
335 and Table S2). However, we note that the percentage of the derived alleles per individual  
336 that come from sites fixed for the derived allele differs markedly between the two  
337 populations. This is seen for all sites as well as in most functional subcategories (e.g. LoF  
338 alleles and GERP scores higher than 6; Table 1; column 4). We also note that the average  
339 number of derived alleles per SNV differs significantly between the two populations in all  
340 categories (Table 1; column 6). All the ratios are significantly larger than 1, indicating that  
341 per SNV, the derived allele is at higher frequency in GI compared to CEU. This  
342 observation combined with our previous observation that the average number of derived  
343 alleles per individual is the same in the two populations, reveals that the derived alleles in  
344 GI are from fewer sites with higher derived allele frequencies and thus that the load under  
345 an additive model is distributed differently in the two populations.

346 Next, we aimed to compare the genetic load under the assumption that deleterious  
347 alleles have a recessive effect. To do this we examined the average number of

348 homozygous derived genotypes per individual. The ratios of this statistic were significantly  
349 higher than 1 (Table 1; column 2 and Figure 3, Figure S4), indicating an accumulation of  
350 homozygous derived genotypes in the GI population. This was seen for all categories,  
351 even for the LoF categories. In fact, the ratio is significantly higher in sites with large  
352 deleterious effects, i.e. GERP scores above 4, compared to neutral sites, i.e. sites with  
353 GERP scores below 2 (see asterisk in Figure 4). These observations suggest that the load  
354 is increased in GI, if the mode of selection is recessive.

355 We also looked at the load statistic proposed by Henn et al.<sup>10</sup>, which we denote as  
356 GERP score load. This statistic approximates load using the original definition by Kimura  
357 et al.<sup>1</sup>, where each GERP score category is translated into a selection coefficient. We  
358 coupled these groups of selection coefficients with two models: one where  $h$  was set to  
359 0.5, i.e. assuming alleles have an additive effect and one where  $h$  was set to 0; i.e.  
360 assuming alleles have a recessive effect (for details see Materials and Methods). When  
361 doing so, we saw no significant difference between the two populations under the additive  
362 model (10.1 (S.E. 0.4) for CEU vs 10.2 (S.E. 0.4) for GI), but a 22% increase in the GERP  
363 score load under the completely recessive model (5.1 (S.E. 0.2) vs 6.2 (S.E. 0.3)) (Figure  
364 3). Furthermore, putatively deleterious SNVs (GERP score > 2) that contribute to the  
365 genetic load are much more common in the GI population compared to the CEU  
366 population (Figure 3). Hence, the results obtained based on GERP scores lead to  
367 qualitatively the same conclusion as the other statistics.

368 We note that we also performed similar load comparisons to 18 individuals with  
369 East Asian ancestry (CHB) and the 18 individuals with African ancestry (YRI) to ensure  
370 that our conclusions were not artifacts of particular features of the CEU. In particular, we  
371 produced the equivalents of Table 1 and figure 4 for these two populations (Table S1,



372 Table S2, Figure S1 and Figure S2). When doing so we reached the same conclusions for  
373 both populations with one exception: when comparing GI and CHB, the ratio of  
374 homozygous-derived genotype counts is indeed higher in sites with large deleterious  
375 effects, i.e. GERP scores above 4, compared to neutral sites, but not significantly so  
376 (Figure S1). However, for YRI this difference is significant (asterisk in Figure S2).

377

### 378 **Comparison of genetic load based on simulations:**

379 To investigate these results further, and try to assess what can be concluded from them,  
380 we performed simulations of GI and CHB populations using the demographic history of  
381 these two populations inferred in Fumagalli et al. <sup>16</sup> We performed the simulations of 12  
382 different selection scenarios that varied both in the effect model used, i.e.  $h$ , and the  
383 selection coefficients,  $s$ , that reflect how deleterious the alleles are. Based on the  
384 simulated data we calculated the ratio of the number of derived alleles between the two  
385 populations and this ratio was not significantly different from 1 in any of the scenarios  
386 (Table S6).

387 We also counted the number of homozygous derived genotypes and, as expected,  
388 we observed a significantly higher number GI than in CHB (Figure S8-9). The increase is  
389 about 19% even without selection (Table S6).

390 Finally, we calculated the true load based on the true effect model and the true  
391 selection coefficient for each site. Interestingly the ratio of this true load in GI and CHB is  
392 significantly higher than 1 in all scenarios, indicating a higher load in GI than in CHB. This  
393 difference decreases as  $h$  increases, however, importantly, even in the scenarios where  
394 additive selection ( $h=0.5$ ) was simulated, the ratio of loads were all significantly above 1,  
395 with the increase varying from 1 to 4% (Figure S9 and Table S6) depending on the

396 strength of selection simulated. The highest load difference was observed for the scenario  
397 with  $s=0.002$ .

398         These results are interesting because they suggest that load statistics, like the  
399 number of derived alleles, will not necessarily reveal if there is a difference in load  
400 between two populations. Thus the results suggest that the fact that GI do not have higher  
401 additive load statistic than CEU in our data cannot necessarily be used to conclude that  
402 there is no difference in load even if all alleles have an additive effect. For the same  
403 reason, it cannot necessarily be used to conclude that selection has not been acting less  
404 efficiently in the GI.

405

#### 406 **Effectiveness of selection:**

407 To investigate to what extent the long recent bottleneck in GI has affected the  
408 effectiveness of selection, we looked at two other summary statistics, which have both  
409 previously been used to address this question in the context of the OOA bottleneck: SFSs  
410 and the proportion of non-synonymous to synonymous mutations<sup>13</sup>.

411         We first compared SFSs for GI and the CEU. Specifically we made SFSs for each  
412 of five the functional categories also used in our previous analyses: synonymous, a  
413 combined category of non-coding exons (NCE) and the leading and trailing untranslated  
414 region (UTR), missense and finally two different LoF categories (Figure S3 and Figure S4).  
415 These SFSs show that GI have a larger proportion of alleles found in higher frequencies,  
416 not only overall, but also within all of the functional categories including LoF, and thus  
417 potentially highly deleterious alleles. And consistent with the results described previously,  
418 the SFSs also show that the GI population has a higher proportion of fixed putatively  
419 deleterious derived alleles in all the functional categories. In contrast, the CEU population

420 has a clear skew towards rare variants. This difference, may reflect the effects of less  
421 efficient purifying selection in GI and/or recent growth in CEU<sup>6,29</sup>. However, we note that  
422 based on simulations similar to the ones presented above, but where each deleterious  
423 allele is set to neutral (changing the selection coefficient to 0) in GI after the start of the GI  
424 bottleneck (Figure S10), we observed a fairly similar SFS to the one where selection  
425 continues to happen after the bottleneck. Thus based on the simulations we do not  
426 necessarily expect to be able to observe if selection is less effective based on large  
427 differences in the SFS of the different functional categories. Next, we compared the ratio of  
428 non-synonymous to synonymous SNPs in the GI populations to that of the CEU population  
429 using the Combined GI and CEU dataset, following what was done by Lohmueller et al.<sup>13</sup>  
430 (Table S4). Specifically, we tested for a difference in this ratio between the two populations  
431 both among all sites and among sites from different GERP scores categories. We found  
432 that ratio of the number of non-synonymous to synonymous SNPs is significantly higher in  
433 CEU than in GI, when considering all sites (first row in Table S4). When considering  
434 different GERP score categories, the non-synonymous to synonymous ratio in GI becomes  
435 even lower relative to that seen in CEU with increasing levels of deleteriousness.

436 We further investigated this pattern by defining neutral sites as those with GERP  
437 scores below 2 and deleterious variants as those with GERP scores above 4 and then  
438 calculating the ratio of deleterious to neutral SNPs for both GI and CEU. When doing so  
439 the deleterious to neutral SNP ratio is significantly lower in the GI compared to the CEU  
440 (Table S4; row 2) and is almost as low as the ratio of non-synonymous to synonymous  
441 sites among the most deleterious GERP scores (Table S4; row 5 and 6). Hence, there  
442 seem to be a higher proportion of deleterious variants in CEU than in GI, particularly for  
443 highly deleterious variants. This is compatible with the notion that selection has not been

444 acting less efficiently in GI than in CEU. Hence the different statistics point towards  
445 different conclusions, which we will discuss later.

446

447 **Consequences for disease mapping:**

448 Regardless of whether selection has acted less efficiently in GI or not, our results clearly  
449 show that individual deleterious variants tend to have higher frequency in GI compared to  
450 CEU (Figure 3). This is potentially of high importance for quantitative trait mapping and  
451 disease mapping as it means that mapping in the GI population will in some cases be  
452 more powerful in the GI population than the CEU population<sup>30</sup> just like it is well-known to  
453 be the case for other historically isolated populations like the Finnish population and the  
454 Native Americans. To investigate the potential of GI, and compare it to that of other  
455 populations, we divided alleles into bins according to their frequency in larger reference  
456 populations and for each bin determined how often the alleles are common among GI  
457 compared to how often they common in other populations. To do this we used allele  
458 frequencies from the Exome aggregation consortium (ExAC). As can be seen in Figure 5  
459 and Figure S9-S11, we find that rare alleles among Non-Finnish Europeans are more likely  
460 to be common in GI than in Finland, East Asia and Latinos. This pattern is especially  
461 pronounced for variants that are extremely rare in Non-Finnish Europeans ( $MAF < 1 \times 10^{-3}$ ).  
462 Similar patterns are seen when looking at variants that are rare in East Asians. This  
463 suggests that the GI population does indeed have potential to provide increased power to  
464 detect alleles that are rare in Non-Finnish Europeans and East Asians. And it suggests  
465 that this potential is even bigger than that of both Latinos and Finns; populations that are  
466 considered particularly powerful for mapping.

467 To pursue this potential of the GI population in a simple manner we investigated all the  
468 LoF including frameshift variants that are present in at least 2 copies in the GI dataset and  
469 are rare, but not absent, in both the European and EAS populations (MAF below 0.5%)  
470 (Table 2, Table S5). We did this because such alleles are of potential interest for the  
471 Europeans and EAS, but difficult to map and investigate in these populations. This  
472 approach led to the identification of 6 SNVs and 14 indels. One of the SNVs, located in  
473 *TBC1D4*, was recently shown to have a very large impact on type 2 diabetes<sup>15</sup> and one of  
474 the indels, located in *SI*, was recently shown to have large impact on a sucrase-isomaltase  
475 deficiency<sup>31</sup>. Other interesting variants include a SNV in *SEMA4C* which gene is  
476 associated with neonatal lethality<sup>17,32</sup> and SNVs in *CRYGA* and *USP45* which might be  
477 involved in cataract and DNA repair, respectively<sup>33,34</sup>.

478

## 479 Discussion

480 We have performed analyses of exome data from the GI population with the aim of  
481 investigating what consequences small population size has had on genetic variation in  
482 humans. We first investigated the demographic history of the GI population and found that  
483 it dramatically decreased in size ~23,000 years ago and remained small for more than 20  
484 thousand years, which corroborates previously reported results<sup>16</sup>. Furthermore, we  
485 observed a flattening of the SFS for populations with increasing distance to Africa, and that  
486 the SFS for the GI population was even more extreme than those for the equally distant  
487 Mayan and Peruvian populations. This suggests that the GI population underwent a strong  
488 bottleneck after it split from the Native Americans. This is consistent with our estimates of  
489 the GI population size over time (Figure 1), where the bottleneck persisted long after the

490 split from Native Americans. This finding makes the GI population highly relevant to the  
491 study of how demography has shaped deleterious variation in humans.

492 Motivated by this we investigated whether the severe bottleneck has affected the  
493 genetic load of the GI population by comparing it to CEU. In this context, it is important to  
494 re-iterate that genetic load cannot be directly calculated from exome data <sup>11</sup>. It can only be  
495 approximated through predictions of whether and to what extent alleles are deleterious,  
496 e.g. via functional annotation. Also, the approximations depend on the underlying effect  
497 model, i.e. whether the effect of the deleterious alleles is additive or recessive. We  
498 therefore compared the genetic load between the GI and CEU populations using several  
499 different proxy statistics. Our analyses reveal no significant differences between the two  
500 populations when using proxy statistics that assume an additive effect, like the number of  
501 derived alleles, but they do show large significant differences when using proxy statistics  
502 for load that assume a recessive effect, like the number of homozygous-derived genotypes  
503 (Table 1). Importantly, we observed similar results when comparing GI to CHB and YRI  
504 (Table S1 and Table S2). These observations are in line with the results from several  
505 previous studies <sup>7,8</sup> and are consistent with our simulations where we observe no  
506 significant effect on the number of derived alleles and a large significant difference in  
507 number of homozygous derived genotypes (Figure 4, Figure S1, Figure S2, Figure S9 and  
508 Table S6). When looking at sites with GERP scores or functional annotations, which  
509 suggest that they harbor highly deleterious alleles we observed a larger increase in  
510 number of derived alleles in GI than in CEU, although the increase is small and non-  
511 significant using jackknife resampling. Therefore, our results are not necessarily conflicting  
512 with Henn et al. <sup>5</sup> that found that the number of deleterious alleles increases with distance  
513 from Africa. However, we would have expected to see a stronger difference in GI than in

514 the Mayan used by Henn et al.<sup>5</sup>. Though, it is possible that we would see such evidence  
515 in our ratios if we analyzed a larger number of samples.

516 Interestingly, our simulations show a significant increase in the true load in the  
517 simulated GI individuals compared to the simulated CHB individuals. Even under an  
518 additive model, there is a small but significant increase of 1-4% depending on the selection  
519 coefficient. This suggests that small population size over a long period of time can indeed  
520 lead to increased load even if all alleles have an additive effect. These simulation results  
521 are in conflict with simulation-based conclusions from Simons et al.<sup>7</sup>, based on deleterious  
522 alleles counts. However, our results fit very well with recent results from Harris and Nielsen  
523<sup>35</sup>: when simulating Neanderthals and humans and assuming a severe bottleneck in  
524 Neanderthal that lasted many times longer than the bottleneck in GI, they observed at  
525 large significant decrease in fitness among Neanderthals even under an additive effect  
526 model. Importantly, our simulation results also revealed that the significant increase in  
527 load observed under additive selection, did not lead to a significant difference in the  
528 number of derived alleles. This suggests that the fact that we do not see a significant  
529 increase in the number of derived alleles in GI compared to CEU (or the other two  
530 populations) does not necessarily mean that there is no difference in load under an  
531 additive model. Furthermore, it supports the conclusion from Lohmueller<sup>11</sup> that part of the  
532 reason why different studies reach different conclusions about load is that they are based  
533 on different approximations of load – some of which may be far from ideal.

534 Either way, our results combined with previous results suggest, that if there are  
535 increases in genetic load under an additive model due to the small population size and  
536 bottlenecks, these increases are small even for an extreme population like the GI. Our  
537 results also clearly show that the extent to which the load is increased in GI due to the

538 severe bottleneck depends heavily on the true underlying effect model. Hence to fully  
539 answer this question more knowledge about the true effect model is needed.

540 The above conclusions make it difficult to use comparisons of our overall load  
541 estimates to make conclusions about whether or not the severe bottleneck in GI has led to  
542 less efficient selection. We therefore also looked at other statistics to address that  
543 question. One of these was the ratio of non-synonymous to synonymous SNPs. If  
544 selection has acted less effectively in GI compared to larger populations like CEU then we  
545 would expect this ratio to be higher in the GI population than in CEU. We observe the  
546 opposite, which could suggest that selection has not acted less efficiently in GI. However,  
547 we note that the ratio of non-synonymous to synonymous SNPs is highly sensitive to  
548 demographic changes and that our observations could also be explained by the recent  
549 explosive population growth in CEU <sup>11</sup>. Importantly, we also note that if selection has acted  
550 equally efficiently in the two populations, then we would expect that the ratio of  
551 homozygous-derived genotypes in the two populations would be the same across  
552 categories with different levels of deleterious effect. However, we find that this is not the  
553 case. On the contrary, the ratio of homozygous-derived genotypes is significantly higher in  
554 sites with large deleterious effects, i.e. GERP scores above 4 and below 6 as compared to  
555 neutral sites, i.e. sites with GERP scores below 2 (see asterisk in Figure 4). This result  
556 was also seen when comparing GI and YRI (asterisk in Figure S2) but not when  
557 comparing GI and CHB (see Figure S1). In the latter case there is an increase in the ratio  
558 between the two categories but it is not significant (Figure S1). This suggests that the  
559 impact of selection is not the same in GI compared to the YRI and CEU populations and  
560 potentially not CHB either. More specifically, it suggests that selection against deleterious  
561 alleles has acted less efficiently in GI under a recessive model compared to the other



562 populations. This argument is supported by the fact that we observed a similar pattern in  
563 our simulations. Here the increase in the homozygous-derived genotype ratio for the sites  
564 under selection (denoted as load ratio in Supplementary Table 6) under a recessive model  
565 is particularly large for alleles with selection coefficient  $s=0.002$ , which correspond to a  
566 GERP score of 4-6<sup>5</sup>(Figure S9-S11). This load difference would also explain the higher  
567 allele frequencies of deleterious alleles frequencies in GI compared to in CEU (Figure 3).  
568 Hence these results combined suggest that selection may indeed have acted less  
569 efficiently, and that the higher ratio of synonymous to non-synonymous sites GI is most  
570 likely explained by the population growth in CEU as has been suggested in other studies  
571 as well<sup>12</sup>.

572 Load is a somewhat abstract concept, none-the-less it has very concrete  
573 connections to disease and although our comparisons of load in GI and CEU may not be  
574 entirely conclusive, they have clear consequences in the context of disease. Our load  
575 comparisons revealed that a lot of variants are lost, also deleterious variants, and that the  
576 deleterious alleles that are not lost are in higher frequency in the GI population than in the  
577 CEU population. This has several disease related implications for the Greenlandic  
578 population. First, it has implication for disease risk. For complex disorders, where many  
579 loci are involved, we do not expect a large difference in genetic load and thus disease risk.  
580 This can be illustrated by the *TBC1D4* variant's impact on the type 2 diabetes prevalence.  
581 Despite its large effect and relatively high frequency<sup>17</sup> (23% MAF in GI) the Greenlandic  
582 population has not had a historically high incidence of type 2 diabetes in Greenland<sup>36</sup>. We  
583 suspect that the absence of other type 2 diabetes variants in GI are compensating for the  
584 presence of the common variants, but acknowledge that other variants may be found if we  
585 investigated a larger amount of data. However, for the rarer more monogenetic traits, we

586 suspect that the genetic load, and thus disease risk, will be very different in Greenland.  
587 Because fewer variants are involved, the variance of the prevalence of the trait will be  
588 much greater. This means that such diseases will likely either entirely absent from the  
589 population or be more prevalent. The SI frameshift variations effect on sucrase-isomaltase  
590 deficiency is an example of the latter. SI deficiency is a very rare disorder in large  
591 populations, but is estimated to affect 5-10% of individuals in Greenland<sup>37,38</sup>. This is  
592 presumably solely due to a single SI frameshift variant, which we find in a homozygous  
593 state in 3 of the individuals among the 9 GI trios (Table S5).

594 It also has implication for our ability to characterize the function of certain genes,  
595 including disease related genes. Due to the higher frequency of deleterious alleles, even  
596 LoF alleles, the GI are enriched for homozygous functional knockouts compared to the  
597 CEU. This enables investigation of the function of the genes that harbor such mutations.

598 Finally, it has implication for disease mapping. It has long been acknowledged that  
599 populations, which have undergone a recent population bottleneck and therefore, like the  
600 Greenlandic population, carry deleterious alleles with higher allele frequency compared to  
601 larger populations are useful in disease studies, because the increased allele frequency  
602 (along with increased LD) leads to increased power in association testing. The Finnish  
603 population is one such population, where two novel mutations have been found to be  
604 associated with lipoprotein levels<sup>39</sup>. Other examples included various Native American  
605 populations where studies have also led to the detection of several novel disease variants.  
606 Interestingly, our analyses show that GI outperform both Finns and Latinos in terms of the  
607 chance of providing improved power in association testing due to higher allele frequencies  
608 (Figure 5, Figure S11-S14). Thus likely, studies aiming to find novel association will have

609 even better power to do so in the GI population compared to previously studied isolated  
610 populations.

611 Our simple screening of the LoF variants provides a simple demonstration how  
612 useful GI can be for disease mapping. It also clearly shows that studies of the Greenlandic  
613 population can be used to identify alleles of large effect. However, populations like the  
614 Greenlandic are also useful for identifying variants with lower effect sizes, because, as this  
615 study shows, such alleles are much more likely to be of high frequency than are alleles of  
616 large effect. Importantly, since our analyses of allele frequencies among GI compared to  
617 Finns and Latinos were carried out for alleles that are rare, but indeed present among  
618 Europeans and East Asians our results also suggests that disease mapping in the  
619 Greenlandic population has great potential to lead to identification of variants that are also  
620 important in larger populations, like the Europeans and East Asians. Thus, all in all our  
621 results show that studies of GI population constitute a particularly promising approach in  
622 future disease mapping.

623

624

625

626

627

628

629

## 630 **Supplemental Material**

631 Our supplemental data comprise 14 figures and 6 tables.

## 632 **Acknowledgements**

633 The Novo Nordisk Foundation Center for Basic Metabolic Research is an independent  
634 Research Center at the University of Copenhagen partially funded by an unrestricted  
635 donation from the Novo Nordisk Foundation ([www.metabol.ku.dk](http://www.metabol.ku.dk)).

## 636 **Web Resources**

637 Henn et al.<sup>5</sup> <https://ecoevo.stonybrook.edu/hennlab/data-software/>

638 ExAC browser

639 [ftp://ftp.broadinstitute.org/pub/ExAC\\_release/release0.3/ExAC.r0.3.sites.vcf.gz](ftp://ftp.broadinstitute.org/pub/ExAC_release/release0.3/ExAC.r0.3.sites.vcf.gz)

640 GERP scores [http://hgdownload.cse.ucsc.edu/gbdb/hg19/bbi/All\\_hg19\\_RS.bw](http://hgdownload.cse.ucsc.edu/gbdb/hg19/bbi/All_hg19_RS.bw)

## 641 **References**

- 644 1. Kimura, M., Maruyama, T., and Crow, J.F. (1963). Mutation load in small populations.  
645 *Genetics* *48*, 1303–1312.
- 646 2. Ohta, T. (1973). Slightly deleterious mutant substitutions in evolution. *Nature* *246*, 96–  
647 98.
- 648 3. Charlesworth, B. (2009). Fundamental concepts in genetics: effective population size  
649 and patterns of molecular evolution and variation. *Nat. Rev. Genet.* *10*, 195–205.
- 650 4. Morton, N.E., Crow, J.F., and Muller, H.J. (1956). An estimate of the mutational damage  
651 in man from data on consanguineous marriages. *Proc Natl Acad Sci U S A* *42*, 855–863.
- 652 5. Henn, B.M., Botigué, L.R., Peischl, S., Dupanloup, I., Lipatov, M., Maples, B.K., Martin,  
653 A.R., Musharoff, S., Cann, H., Snyder, M.P., et al. (2015). Distance from sub-Saharan  
654 Africa predicts mutational load in diverse human genomes. *Proc. Natl. Acad. Sci.* *113*,  
655 E440–E444.
- 656 6. Boyko, A.R., Williamson, S.H., Indap, A.R., Degenhardt, J.D., Hernandez, R.D.,  
657 Lohmueller, K.E., Adams, M.D., Schmidt, S., Sninsky, J.J., Sunyaev, S.R., et al. (2008).  
658 Assessing the evolutionary impact of amino acid mutations in the human genome. *PLoS*  
659 *Genet.* *4*, e1000083.
- 660 7. Simons, Y.B., Turchin, M.C., Pritchard, J.K., and Sella, G. (2014). The deleterious  
661 mutation load is insensitive to recent population history. *Nat. Genet.* *46*, 220–224.
- 662 8. Do, R., Balick, D., Li, H., Adzhubei, I., Sunyaev, S., and Reich, D. (2015). No evidence

- 663 that selection has been less effective at removing deleterious mutations in Europeans than  
664 in Africans. *Nat. Genet.* *47*, 126–131.
- 665 9. Fu, W., Gittelman, R.M., Bamshad, M.J., and Akey, J.M. (2014). Characteristics of  
666 neutral and deleterious protein-coding variation among individuals and populations. *Am. J.*  
667 *Hum. Genet.* *95*, 421–436.
- 668 10. Henn, B.M., Botigué, L.R., Bustamante, C.D., Clark, A.G., and Gravel, S. (2015).  
669 Estimating the mutation load in human genomes. *Nat. Rev. Genet.* *16*, 333–343.
- 670 11. Lohmueller, K.E. (2014). The distribution of deleterious genetic variation in human  
671 populations. *Curr. Opin. Genet. Dev.* *29*, 139–146.
- 672 12. Lohmueller, K.E. (2014). The Impact of population demography and selection on the  
673 genetic architecture of complex traits. *PLoS Genet.* *10*, e1004379.
- 674 13. Lohmueller, K.E., Indap, A.R., Schmidt, S., Boyko, A.R., Hernandez, R.D., Hubisz,  
675 M.J., Sninsky, J.J., White, T.J., Sunyaev, S.R., Nielsen, R., et al. (2008). Proportionally  
676 more deleterious genetic variation in European than in African populations. *Nature* *451*,  
677 994–997.
- 678 14. Raghavan, M., DeGiorgio, M., Albrechtsen, A., Moltke, I., Skoglund, P., Korneliussen,  
679 T.S., Gronnøw, B., Appelt, M., Gulløv, H.C., Friesen, M., et al. (2014). The genetic  
680 prehistory of the new world arctic. *Science* *345*, 1255832.
- 681 15. Gulløv, H.C. Grønlands forhistorie (Gyldendal, Copenhagen, 2004).
- 682 16. Fumagalli, M., Moltke, I., Grarup, N., Racimo, F., Bjerregaard, P., Jørgensen, M.E.,  
683 Korneliussen, T.S., Gerbault, P., Skotte, L., Linneberg, A., et al. (2015). Greenlandic Inuit  
684 show genetic signatures of diet and climate adaptation. *Science* *349*, 1343–1347.
- 685 17. Moltke, I., Grarup, N., Jørgensen, M.E., Bjerregaard, P., Treebak, J.T., Fumagalli, M.,  
686 Korneliussen, T.S., Andersen, M.A., Nielsen, T.S., Krarup, N.T., et al. (2014). A common  
687 Greenlandic TBC1D4 variant confers muscle insulin resistance and type 2 diabetes.  
688 *Nature* *512*, 190–193.
- 689 18. McVean, G.A., Altshuler (Co-Chair), D.M., Durbin (Co-Chair), R.M., Abecasis, G.R.,  
690 Bentley, D.R., Chakravarti, A., Clark, A.G., Donnelly, P., Eichler, E.E., Flicek, P., et al.  
691 (2012). An integrated map of genetic variation from 1,092 human genomes. *Nature* *491*,  
692 56–65.
- 693 19. Moltke, I., Fumagalli, M., Korneliussen, T.S., Crawford, J.E., Bjerregaard, P.,  
694 Jørgensen, M.E., Grarup, N., Gulløv, H.C., Linneberg, A., Pedersen, O., et al. (2015).  
695 Uncovering the genetic history of the present-day greenlandic population. *Am. J. Hum.*  
696 *Genet.* *96*, 54–69.
- 697 20. Li, H., Handsaker, B., Wysoker, A., Fennell, T., Ruan, J., Homer, N., Marth, G.,  
698 Abecasis, G., Durbin, R., and Subgroup, 1000 Genome Project Data Processing (2009).  
699 The sequence alignment/map format and SAMtools. *Bioinformatics* *25*, 2078–2079.
- 700 21. Danecek, P., Auton, A., Abecasis, G., Albers, C.A., Banks, E., DePristo, M.A.,  
701 Handsaker, R.E., Lunter, G., Marth, G.T., Sherry, S.T., et al. (2011). The variant call  
702 format and VCFtools. *Bioinformatics* *27*, 2156–2158.
- 703 22. Korneliussen, T., Albrechtsen, A., and Nielsen, R. (2014). ANGSD: Analysis of Next  
704 Generation Sequencing Data. *BMC Bioinformatics* *15*, 356.
- 705 23. Cooper, G.M., Stone, E.A., Asimenos, G., Green, E.D., Batzoglou, S., and Sidow, A.  
706 (2005). Distribution and intensity of constraint in mammalian genomic sequence. *Genome*  
707 *Res.* *15*, 901–913.
- 708 24. Goode, D.L., Cooper, G.M., Schmutz, J., Dickson, M., Gonzales, E., Tsai, M., Karra,  
709 K., Davydov, E., Batzoglou, S., Myers, R.M., et al. (2010). Evolutionary constraint  
710 facilitates interpretation of genetic variation in resequenced human genomes. *Genome*

- 711 Res. 20, 301–310.
- 712 25. Liu, X., and Fu, Y.-X. (2015). Exploring population size changes using SNP frequency  
713 spectra. *Nat. Genet.* 47, 555–559.
- 714 26. Busing, F.M.T.A., Meijer, E., and Leeden, R.V.D. (1999). Delete- m Jackknife for  
715 Unequal m. *Stat. Comput.* 9, 3–8.
- 716 27. Messer, P.W. (2013). SLiM: Simulating Evolution with Selection and Linkage. *Genetics*  
717 194, 1037–1039.
- 718 28. Marth, G.T., Czabarka, E., Murvai, J., and Sherry, S.T. (2004). The Allele Frequency  
719 Spectrum in Genome-Wide Human Variation Data Reveals Signals of Differential  
720 Demographic History in Three Large World Populations. *Genetics* 166, 351–372.
- 721 29. Nielsen, R., Bustamante, C., Clark, A.G., Glanowski, S., Sackton, T.B., Hubisz, M.J.,  
722 Fledel-Alon, A., Tanenbaum, D.M., Civello, D., White, T.J., et al. (2005). A scan for  
723 positively selected genes in the genomes of humans and chimpanzees. *PLoS Biol.* 3,  
724 e170.
- 725 30. Hong, E.P., and Park, J.W. (2012). Sample Size and Statistical Power Calculation in  
726 Genetic Association Studies. *Genomics Inform.* 10, 117.
- 727 31. Marcadier, J.L., Boland, M., Scott, C.R., Issa, K., Wu, Z., Mcintyre, A.D., Hegele, R.A.,  
728 Geraghty, M.T., and Lines, M.A. (2014). Congenital sucrase—ismaltase deficiency:  
729 identification of a common Inuit founder mutation. *Can. Med. Assoc. J.* 187, 102–107.
- 730 32. Maier, V., Jolicoeur, C., Rayburn, H., Takegahara, N., Kumanogoh, A., Kikutani, H.,  
731 Tessier-Lavigne, M., Wurst, W., and Friedel, R.H. (2011). Semaphorin 4C and 4G are  
732 ligands of Plexin-B2 required in cerebellar development. *Mol. Cell. Neurosci.* 46, 419–431.
- 733 33. Kapur, S., Mehra, S., Gajjar, D., Vasavada, A., Kapoor, M., Sharad, S., Alapure, B.,  
734 and Rajkumar, S. (2009). Analysis of single nucleotide polymorphisms of CRYGA and  
735 CRYGB genes in control population of western Indian origin. *Indian J. Ophthalmol.* 57,  
736 197–201.
- 737 34. Perez-Oliva, A.B., Lachaud, C., Szyniarowski, P., Muñoz, I., Macartney, T., Hickson, I.,  
738 Rouse, J., and Alessi, D.R. (2015). USP 45 deubiquitylase controls ERCC 1 – XPF  
739 endonuclease-mediated DNA damage responses. *EMBO J.* 34, 326–343.
- 740 35. Harris, K., and Nielsen, R. (2016). The genetic cost of neanderthal introgression.  
741 *Genetics* Early online April 2, 2016; DOI: 10.1534/genetics.
- 742 36. Jorgensen, M.E., Bjeregaard, P., Borch-Johnsen, K., Backer, V., Becker, U.,  
743 Jorgensen, T., and Mulvad, G. (2002). Diabetes and impaired glucose tolerance among  
744 the Inuit population of greenland. *Diabetes Care* 25, 1766–1771.
- 745 37. McNair, A., Gudmand-Hoyer, E., Jarnum, S., and Orrild, L. (1972). Sucrose  
746 malabsorption in Greenland. *Br. Med. J.* 2, 19–21.
- 747 38. Gudmand-Høyer, E., Fenger, H.J., Kern-Hansen, P., and Madsen, P.R. (1987).  
748 Sucrase deficiency in Greenland. Incidence and genetic aspects. *Scand. J. Gastroenterol.*  
749 22, 24–28.
- 750 39. Lim, E.T., Würtz, P., Havulinna, A.S., Palta, P., Tukiainen, T., Rehnström, K., Esko, T.,  
751 Mägi, R., Inouye, M., Lappalainen, T., et al. (2014). Distribution and medical impact of  
752 loss-of-function variants in the Finnish founder population. *PLoS Genet.* 10, e1004494.
- 753
- 754
- 755
- 756
- 757

758 **Figures**

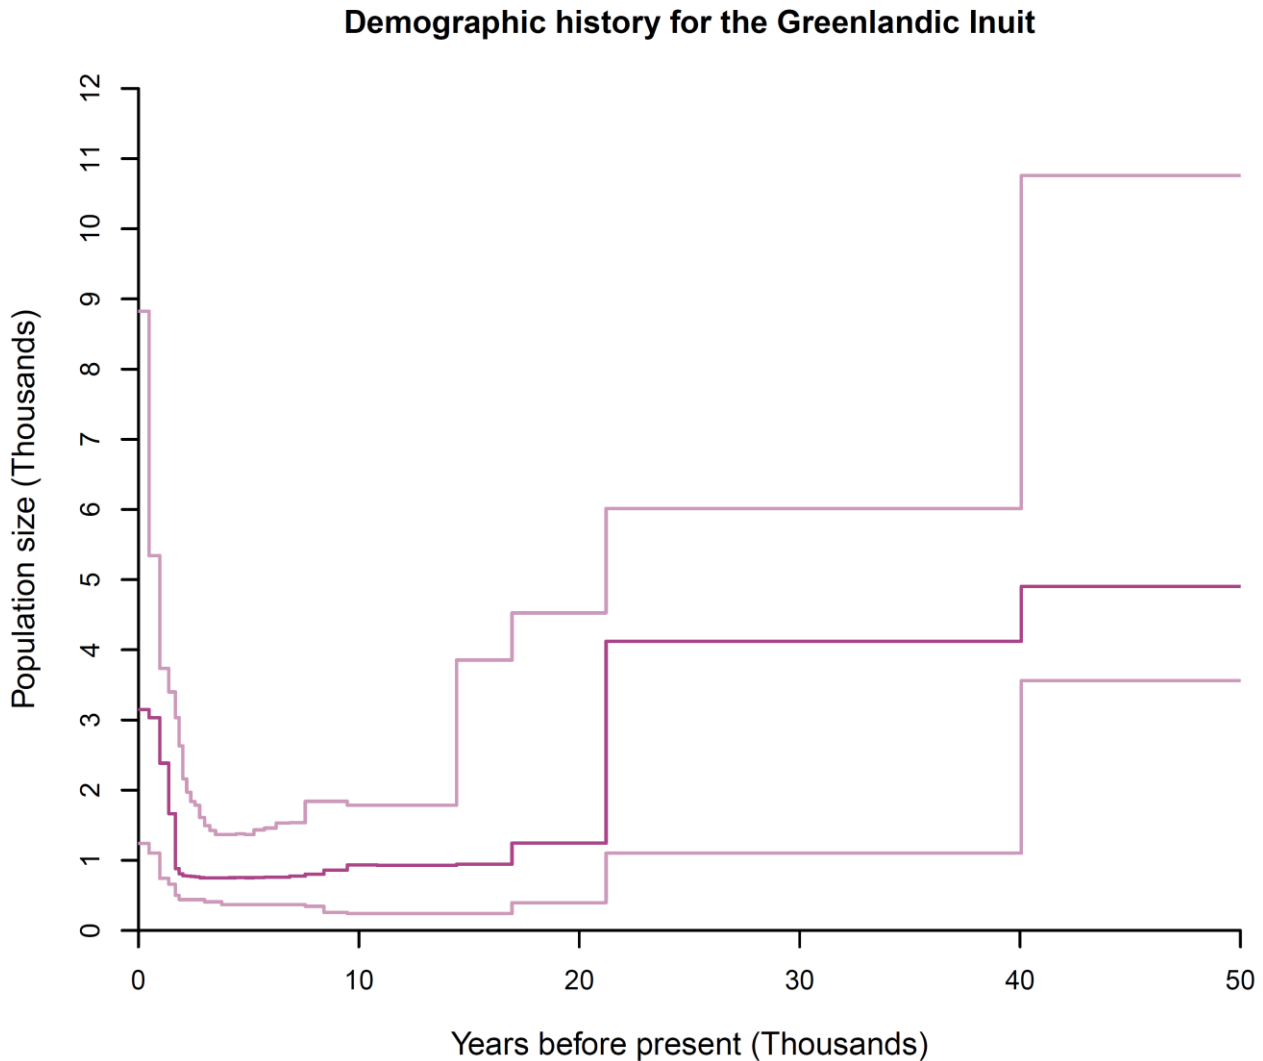

759 Years before present (Thousands)

760 **Figure 1. Stairway plot for the Greenlandic Inuit population.**

761 The dark pink line shows the estimated diploid population size changes in discrete  
762 increments for the last 50k years. The estimates were obtained with the method “Stairway  
763 plot”, which bases its estimates on the site frequency spectrum. The estimates are based  
764 on an assumption of a mutation rate of  $1.2 \times 10^{-8}$  per site per generation and a generation  
765 time of 24 years. The light pink lines represent 95% CI based on bootstraps. This analysis  
766 was based on 41,222,102 sites.

767

### SFS comparison for six human populations

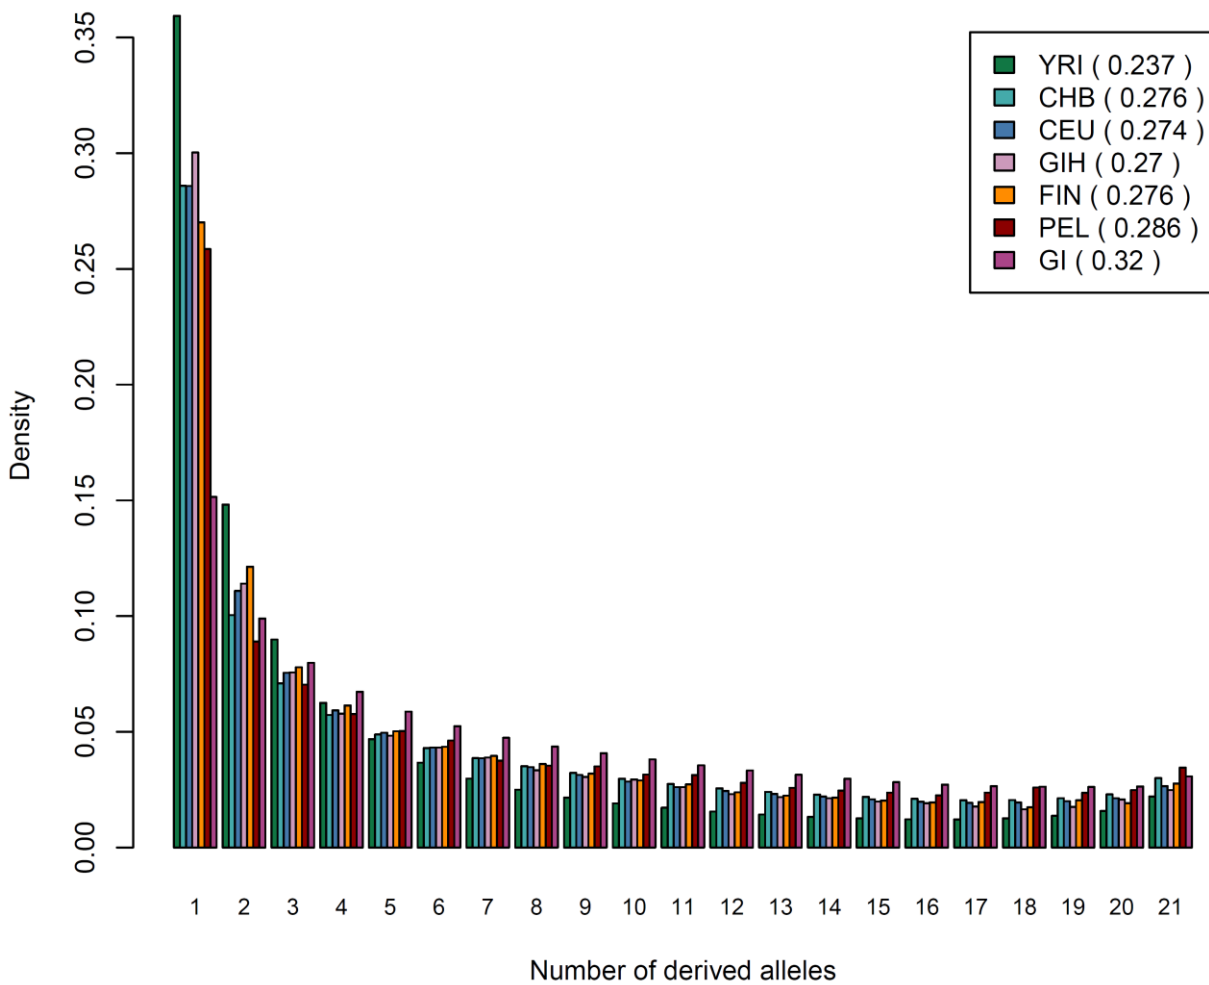

768

769 **Figure 2. Site frequency spectrum for six human populations.**

770 We used 11 randomly sampled individuals from each population to infer the site frequency  
771 spectrum and excluded fixed categories. The GI population has fewer sites in the singleton  
772 category, but more in the remaining more “common” categories. Each population is  
773 followed by a  $\pi_{\text{var}}$  estimate per variable site.

774

775

776

777



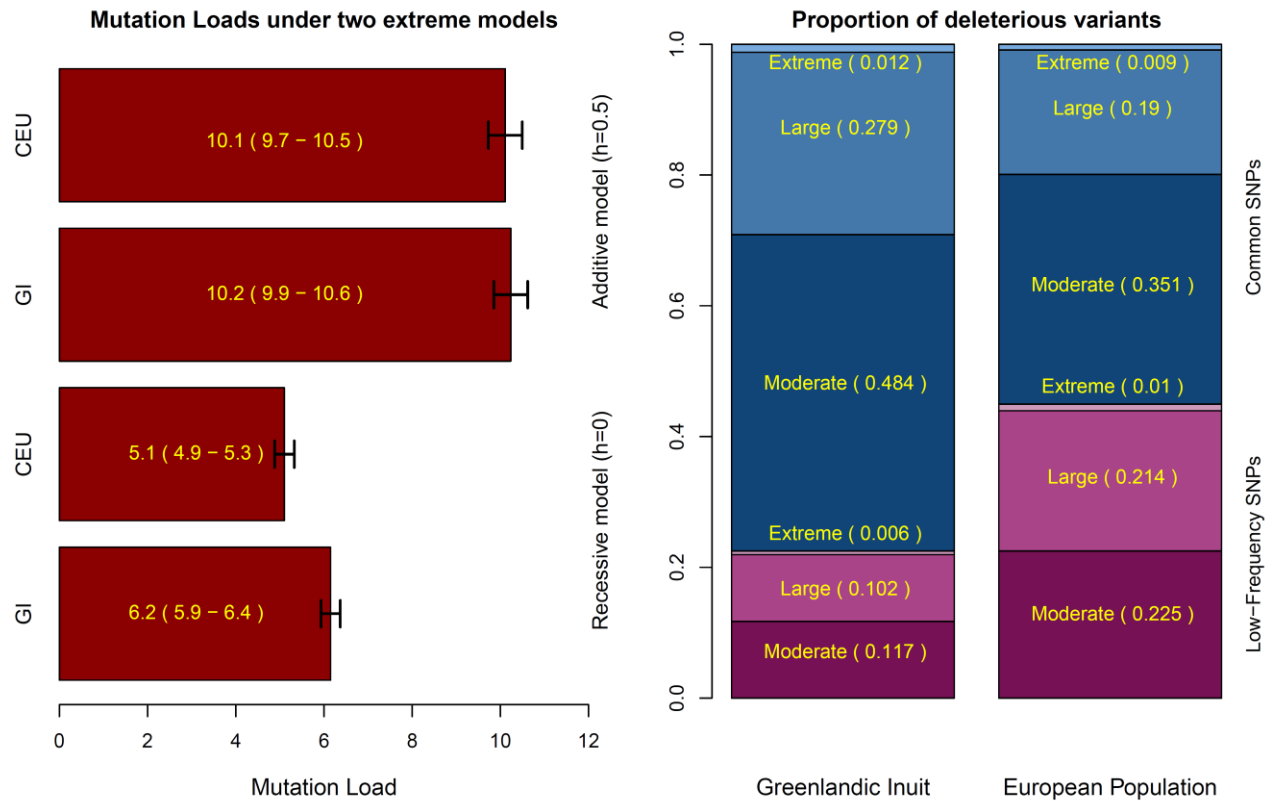

778

779 **Figure 3. Mutation Load and Load proportions.**

780 The left plot shows the genetic load using a fully additive model (top two bars) and a fully

781 recessive model (bottom two bars). These genetic load values are based on annotated

782 GERP scores converted to selection coefficients using the approach from Boyko et al.<sup>6</sup>

783 We note that if the selection coefficients from Henn et al.<sup>5</sup> are used instead, we see

784 qualitatively similar results. The genetic load was calculated as in Lohmuller<sup>11</sup>. Black error

785 bars indicate 95% C.I. The right plot shows the proportion of deleterious variants classified

786 by GERP score (Moderate: 2<GERP<4, Large: 4<GERP<6, Extreme: 6<GERP) and their

787 frequency in the populations (Low vs common). Low frequency SNPs are here defined as

788 singletons and doubletons (equivalent of a frequency of at most 1/18≈0.056), while

789 common SNPs are defined as tripletons or more than that including fixed derived sites

790 (equivalent of a frequency of 1/12 or above).

791

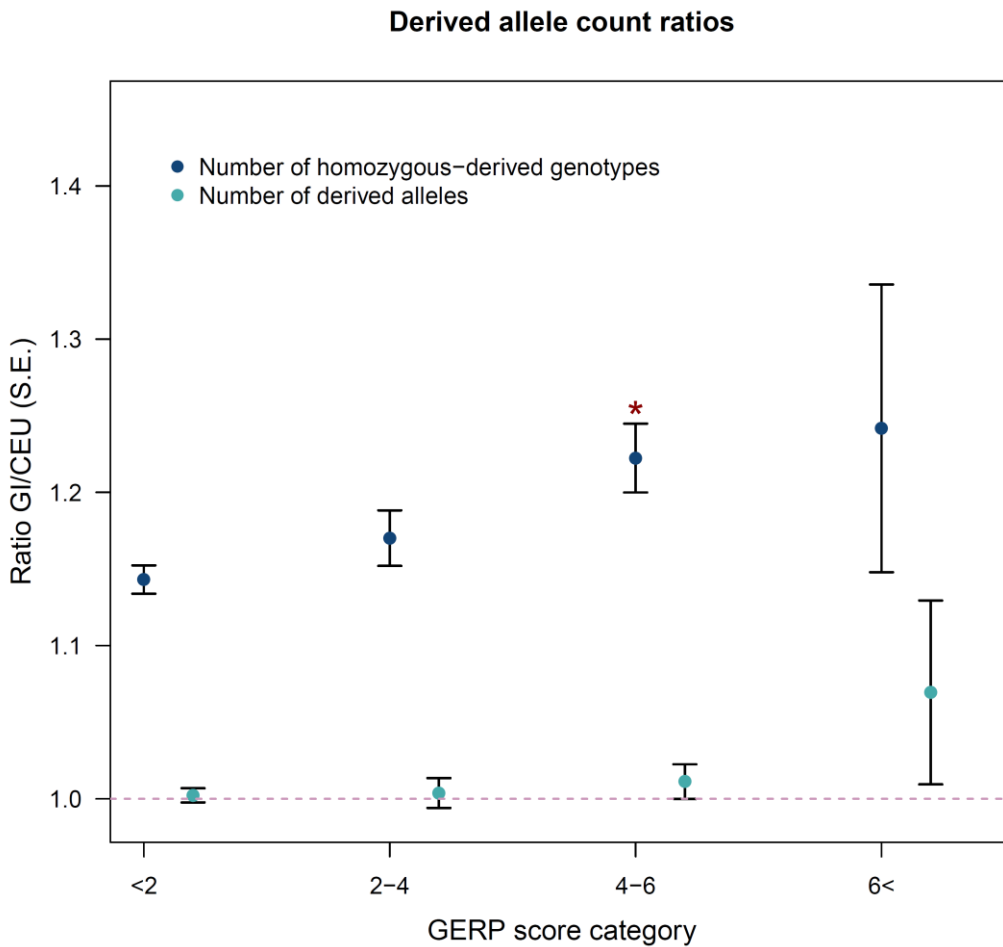

792

793 **Figure 4. Load statistic ratios.**

794 For each of four GERP score categories two ratios calculated based on sites located in  
795 exons are shown: the ratio of derived allele counts in GI versus CEU (turquoise) and the  
796 ratio of homozygous-derived genotype counts in GI versus CEU (blue). The former can be  
797 viewed as an approximation for the ratio of load between the two populations under an  
798 additive model and latter can be viewed as an approximation for the ratio of load between  
799 the two populations under a recessive model. Standard error for each ratio is indicated by  
800 error bars. Additional Information is available in Table 1. The \* indicates significance  
801 compared to the neutral GERP score category (GERP<2) ( $P = 5.3 \times 10^{-4}$ ) using a z-test  
802 (compare column two for row 7 and 9 in Table 1).

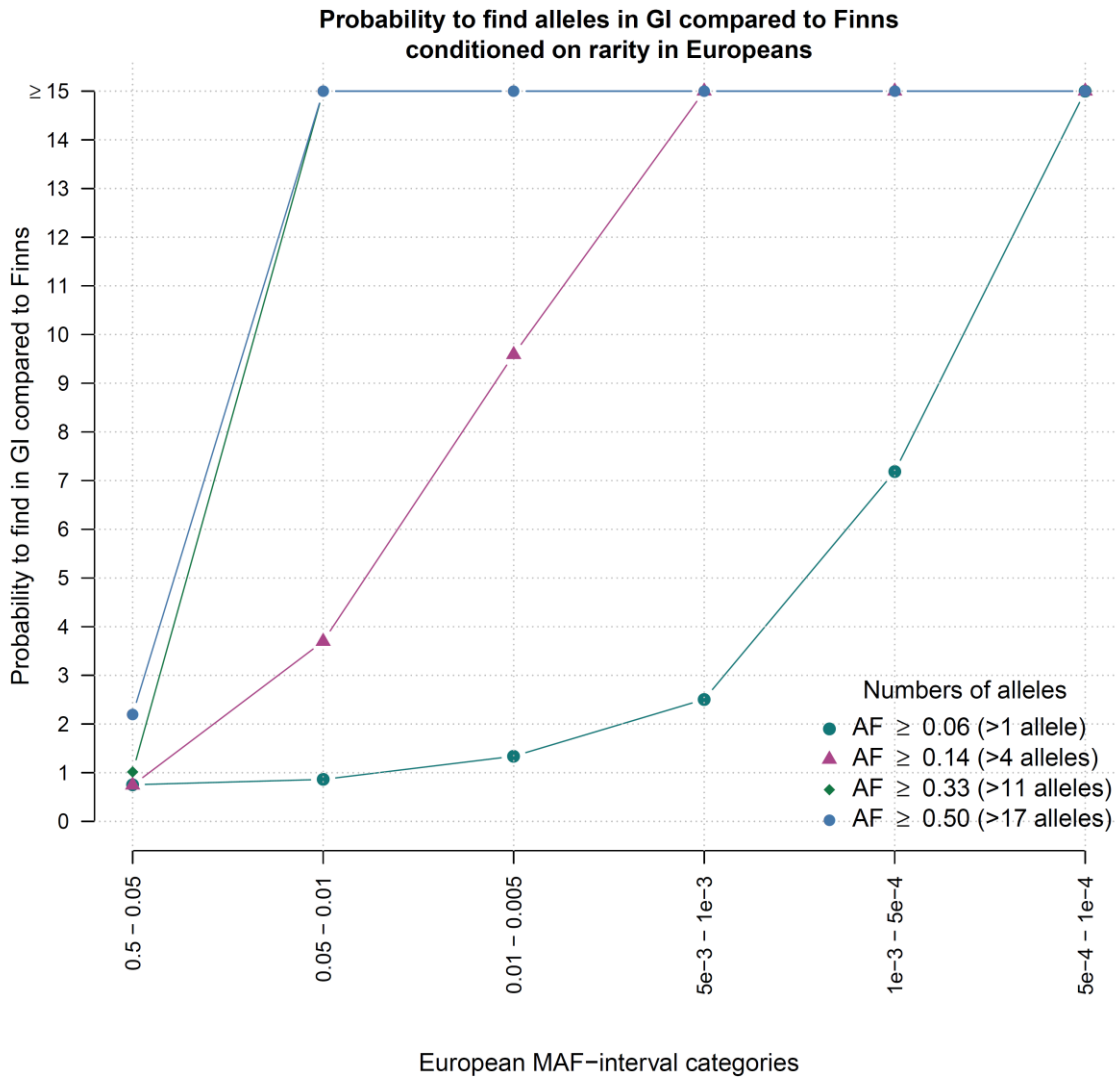

803

804 **Figure 5. Probability of common alleles.**

805 For alleles in different frequency categories in Europeans (x-axis) the points show how  
806 much more likely the alleles are to be common in GI than in Finns (y-axis). Common is  
807 here defined in 4 different ways, each represented by a specific color point, e.g. the dark  
808 blue circles represents results for analyses made with common defined as more than 2 out  
809 of 36 alleles, which corresponds to a frequency of  $\approx 0.056$  (for the remaining definitions,  
810 see the figure legend).

811

812

813 **Tables**

814

815 **Table 1. Summary of load investigations.**

816 Comparisons between 18 Greenlandic Inuit (GI) and 18 Utah Residents (CEPH) with Northern and

817 Western Ancestry (CEU) individuals using 93,047 SNPs sites located in genic regions with full

818 information for both populations. Ratios are the sum within GI divided by the sum within CEU.

819 Standard errors are given in parentheses.

| Category (N SNV)                | Ratio of derived allele counts (SE) | Ratio of homozygous-derived genotype counts (SE) | Ratio of derived alleles in fixed sites (SE) | Derived alleles from fixed sites | Ratio of derived alleles per SNV (SE) | $R_{xy}$ (SE) |
|---------------------------------|-------------------------------------|--------------------------------------------------|----------------------------------------------|----------------------------------|---------------------------------------|---------------|
| <b>Derived Alleles (49631)</b>  | 1.002 (0.004)                       | 1.156 (0.008)                                    | 4.413 (0.301)                                | GI:17.0% CEU:3.9%                | 1.484 (0.009)                         | 1.004 (0.008) |
| <b>Synonymous (20693)</b>       | 1.006 (0.005)                       | 1.156 (0.010)                                    | 4.733 (0.420)                                | GI:18.2% CEU:3.9%                | 1.420 (0.011)                         | 1.013 (0.012) |
| <b>NCE+UTR (4919)</b>           | 1.006 (0.012)                       | 1.168 (0.022)                                    | 5.268 (0.900)                                | GI:17.9% CEU:3.4%                | 1.466 (0.023)                         | 1.013 (0.026) |
| <b>Missense (23582)</b>         | 0.996 (0.006)                       | 1.151 (0.012)                                    | 3.899 (0.377)                                | GI:15.5% CEU:4.0%                | 1.550 (0.013)                         | 0.993 (0.013) |
| <b>LoF (400)</b>                | 1.009 (0.063)                       | 1.296 (0.131)                                    | 2.500 (2.840)                                | GI:9.3% CEU:3.8%                 | 1.625 (0.115)                         | 0.991 (0.104) |
| <b>LoF<sup>a</sup> (278)</b>    | 1.045 (0.099)                       | 1.457 (0.286)                                    | -                                            | GI:0% CEU:4.4%                   | 2.026 (0.194)                         | 1.064 (0.142) |
| <b>GERP &lt; 2 (29183)</b>      | 0.999 (0.005)                       | 1.140 (0.009)                                    | 4.293 (0.291)                                | GI:18.4% CEU:4.0%                | 1.414 (0.009)                         | 0.999 (0.010) |
| <b>GERP &gt;2:&lt;4 (9853)</b>  | 1.001 (0.010)                       | 1.169 (0.018)                                    | 4.725 (0.757)                                | GI:15.3% CEU:3.1%                | 1.517 (0.019)                         | 1.002 (0.019) |
| <b>GERP &gt;4:&lt;6 (10211)</b> | 1.011 (0.011)                       | 1.222 (0.022)                                    | 4.659 (0.919)                                | GI:12.7% CEU:2.8%                | 1.697 (0.023)                         | 1.021 (0.021) |
| <b>GERP &gt;6 (353)</b>         | 1.069 (0.060)                       | 1.244 (0.093)                                    | -                                            | GI:8.6% CEU:0%                   | 1.888 (0.130)                         | 1.127 (0.113) |

820 <sup>a</sup> = unambiguous sites (sites where all possible functional annotations were LOF annotations)

821 - indicates that too few sites fall in this the category to allow a meaningful result

822

823

824

825

826

827

828

829

830

831

832

833

834

835

836 **Table 2. Summary of Loss of Function mutations.**

837 LoF variant (Stop & splice variants) annotation for alleles that are rare in Europeans and East

838 Asians (below a MAF of 0.5%) but not lost.

| rs number   | Gene name      | Possible clinical implications        | Genotypes among the 18 Inuit (Parents only) | Reference allele |
|-------------|----------------|---------------------------------------|---------------------------------------------|------------------|
| rs12471298  | <i>SEMA4C</i>  | Neonatal lethality                    | CC=12,CA=6                                  | C                |
| rs61736969  | <i>TBC1D4</i>  | Type 2 diabetes                       | GG=7,GA=7,AA=4                              | G                |
| rs116344874 | <i>CRYGA</i>   | Cataract                              | GG=13,GA=5                                  | G                |
| rs189281869 | <i>USP45</i>   | DNA repair (following UV irradiation) | TT=15,TA=3                                  | T                |
| rs189664399 | <i>SIGLEC7</i> | unknown                               | CC=15,CT=3                                  | C                |
| rs201985967 | <i>SPAG4</i>   | unknown                               | TT=13,TA=5                                  | T                |

839  
840

841

842

843
